# Supplementary material
Source: Springer Nature journal article supplement (https://www.springermedizin.de/resource/supplementary/12916_2011_498_MOESM1_ESM.pdf/9598190)

A

PI

SKOV-3

OVCAR-3

TOV-21G

A2780

OVCAR 429

OVCAR 433

Control

50 $\mu$ M DIM75 $\mu$ M DIM

B

i

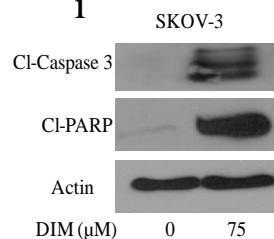

ii

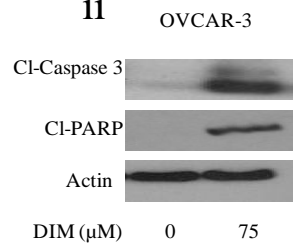

iii

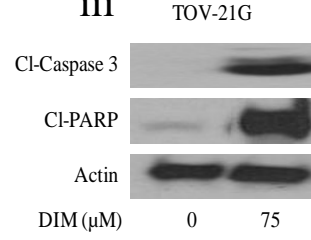

iv

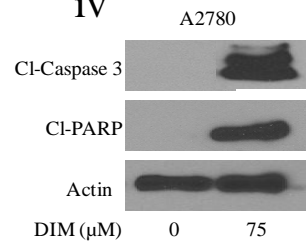

V

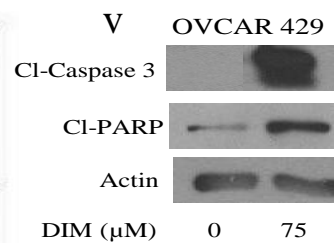

vi

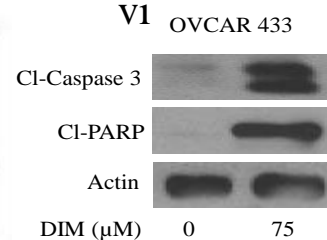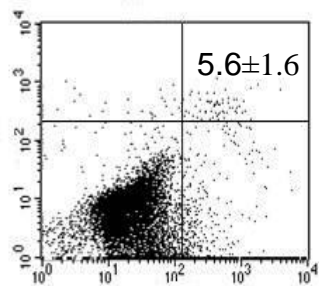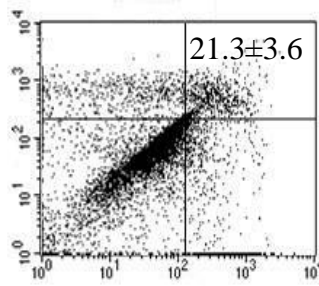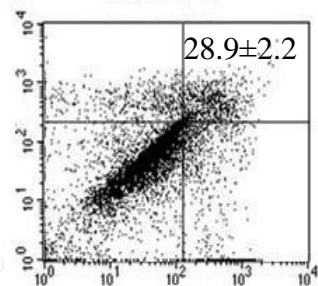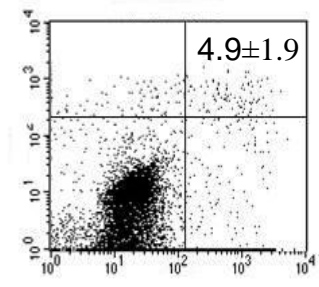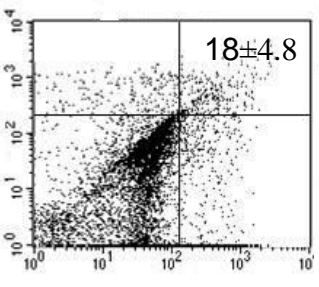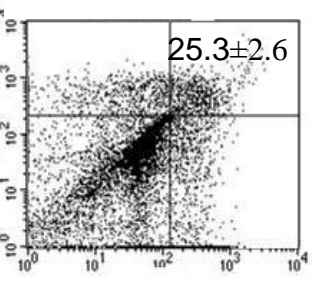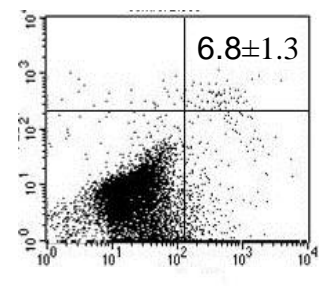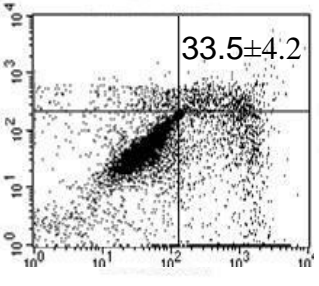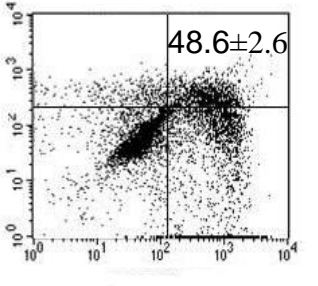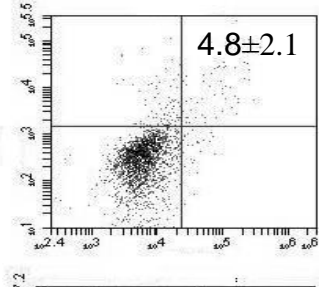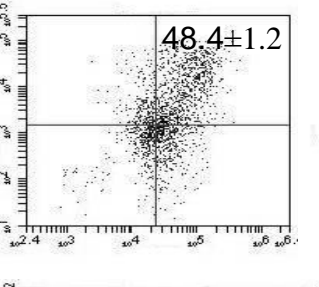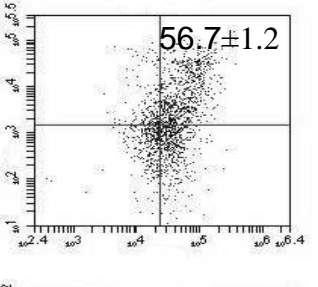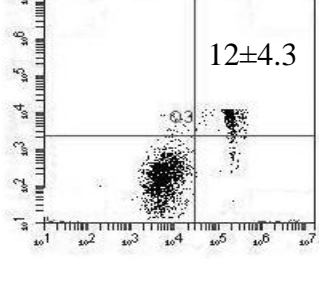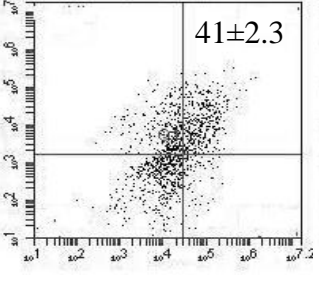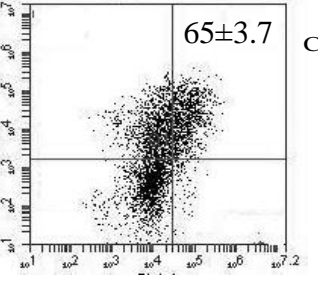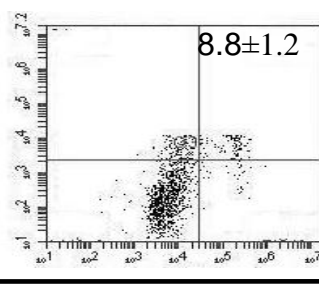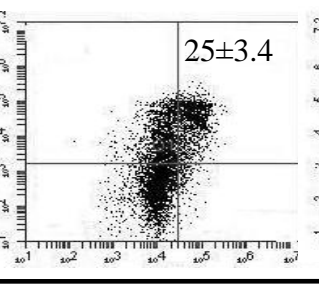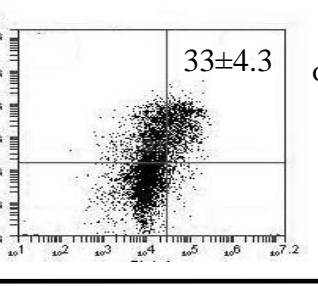

Annexin

Supplement: MOESM1 [file 9598190]
